# Supplementary material for: Cre-Recombinase Induces Apoptosis and Cell Death in Enterocyte Organoids
Source: MDPI journal article supplement (doi:10.3390/antiox11081452), 2022-07-26
Supplement: s1 [file s1]

Supplementary Materials

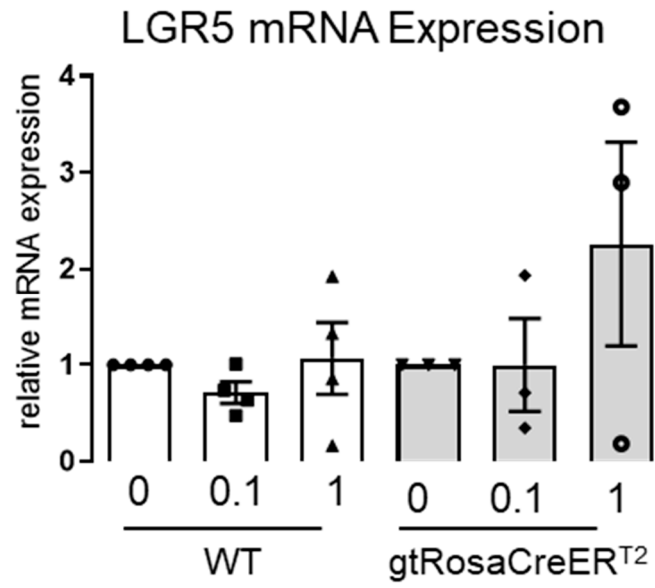

**Figure S1. 4-OHT treatment does not affect LGR5 mRNA expression.** Quantitative PCR; n = 3–4; mean with SEM; 2-way Anova revealed no significant differences.
